# Supplementary material for: Controlled doping of transition metal dichalcogenides by metal work function tuning in phthalocyanine compounds
Source: Royal Society of Chemistry journal article supplement (doi:10.1039/c7nr08497h), 2018-01-01
Supplement: c7nr08497h1.pdf [file c7nr08497h1.pdf]

## Supplementary Information

# Controlled Doping of Transition Metal Dichalcogenides by Metal Workfunction Tuning in Phthalocyanine Compounds

Christopher J. Benjamin,<sup>a†</sup> Suki Zhang,<sup>a†</sup> and Zhihong Chen<sup>a</sup>

### Supplemental Figures

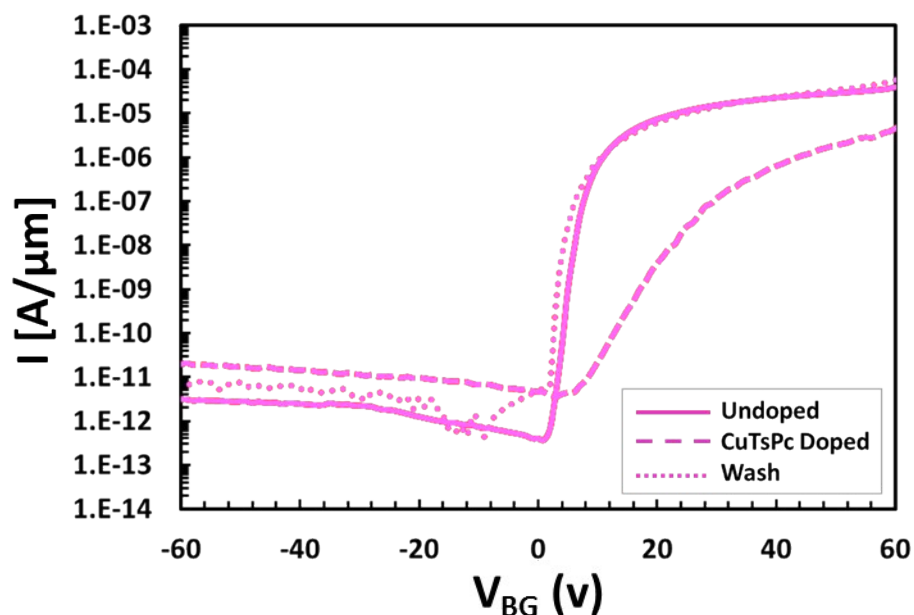

**Supplemental Figure 1:** Transfer characteristics of a MoS<sub>2</sub> device before and after CuTsPc doping, and removal of the doping effect by resolubilizing the dopants in solvent.

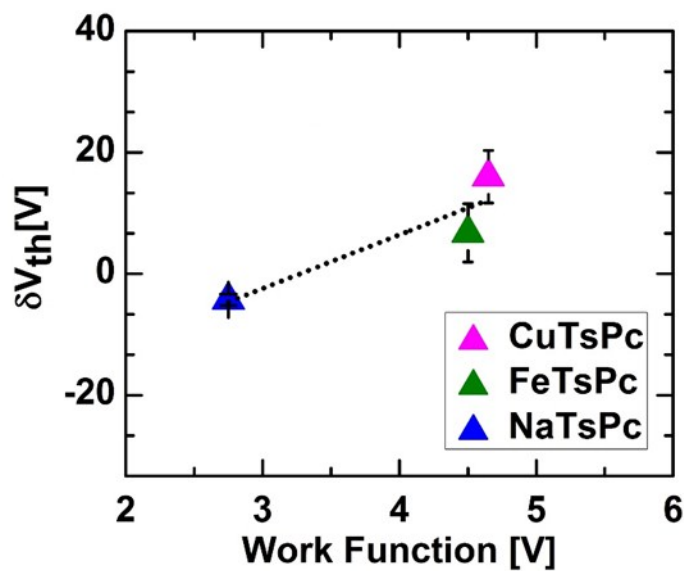

**Supplemental Figure 2:** The trend of correlating  $V_{TH}$  shift after molecular doping with work functions of metal core atoms in MoS<sub>2</sub> devices

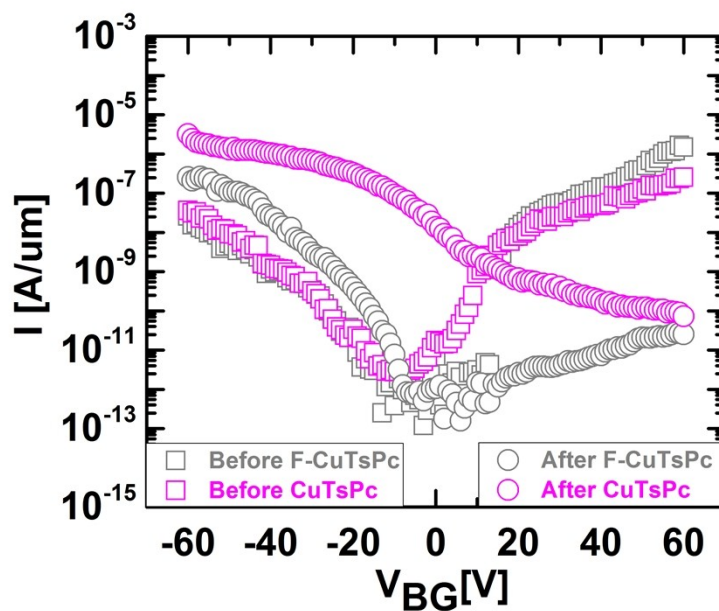

**Supplemental Figure 3:** The Effect of fluorination on Metal-phythalocyanene doping of by comparing doping effect of CuTsPc and F-CuTsPc in WSe<sub>2</sub> devices.

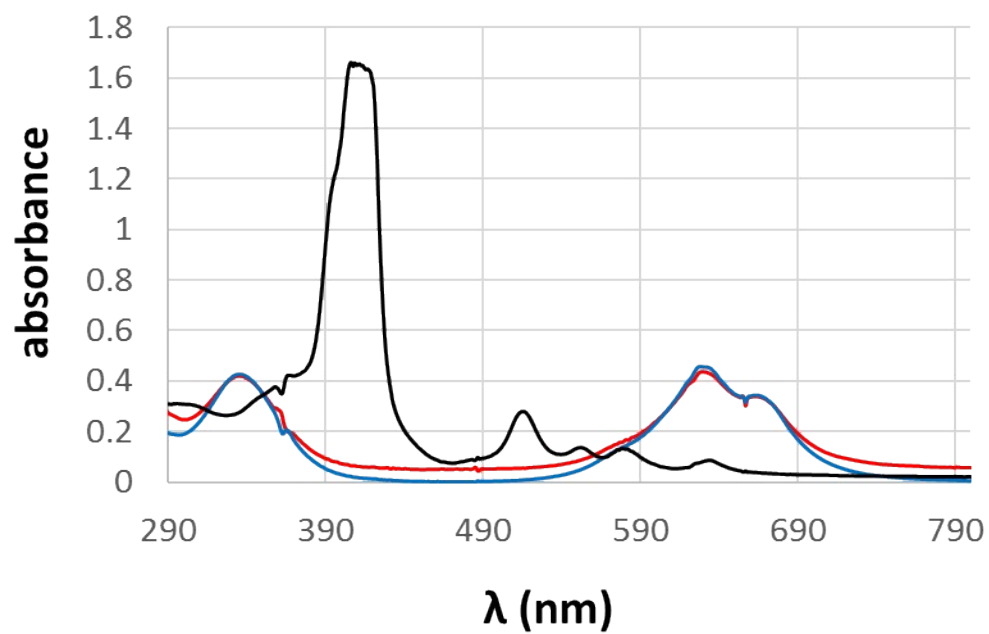

**Supplemental Figure 4:** UV-vis spectra of metal free phthalocyanine (black), PtTsPc (red), and Na<sub>2</sub>TsPc (blue)
